# Supplementary material for: Discovery and Validation of a Six-Marker Serum Protein Signature for the Diagnosis of Active Pulmonary Tuberculosis
Source: PubMed Central journal article supplement (PMC5625392; doi:10.1128/jcm.00467-17), 2017-09-25

FIG S1 TB biomarker discovery in Phase 1.

A. Demographic and clinical data of samples analyzed by 1129plex SOMAscan. B. Volcano plot of serum proteins differentially expressed in 333 serum samples (TB vs. non-TB). Toward the top are markers with the best KS statistics, and to the extreme right and left are the proteins with the largest median fold-change. C. Stability paths of logistic regression analysis, for protein data alone (upper panel) and protein data augmented by age, gender, site, and country (lower panel). D. Correlation matrices for candidate biomarkers ranked by KS statistics. The color gradient is based on the Spearman rho factor for protein pairs with positive correlation (red), no correlation (white), and negative correlation (blue). E. Correlation matrices for candidate biomarkers stability selection using logistic regression.

A.

| Demographic or clinical parameter            | Phase I (tested on 1129plex) |                      |
|----------------------------------------------|------------------------------|----------------------|
|                                              | Training/Test                | Blinded Verification |
| Number of samples tested                     | 450                          | 300                  |
| South Africa                                 | 151                          | 115                  |
| Peru                                         | 47                           | 84                   |
| Vietnam                                      | 252                          | 101                  |
| Active TB, culture-confirmed                 | 225 (50%)                    | 150 (50%)            |
| Smear-positive TB                            | 200 (89% of cases)           | 100 (67% of cases)   |
| Smear-negative TB                            | 25 (11% of cases)            | 50 (33% of cases)    |
| Included in analysis                         | 419 (93.1%)                  | 270 (90%)            |
| HIV co-infection, n (%)                      | 150 (33%)                    | 120 (40%)            |
| Age, years (range) <sup>a</sup>              | 36 (17-81), n=445            | 36 (18-76), n=110    |
| Gender (%male) <sup>a</sup>                  | 65.0%, n=449                 | 60.5%, n=261         |
| Weight, kg (range) <sup>a</sup>              | 58 (36-92), n=208            | Not reported         |
| Height, cm (range) <sup>a</sup>              | 165 (134-189), n=223         | 161 (140-175), n=54  |
| BMI, kg m <sup>-2</sup> (range) <sup>a</sup> | 20.9 (14.5-37.7), n=198      | Not reported         |

<sup>a</sup>Reported for a subset of the samples only, as indicated by *n*

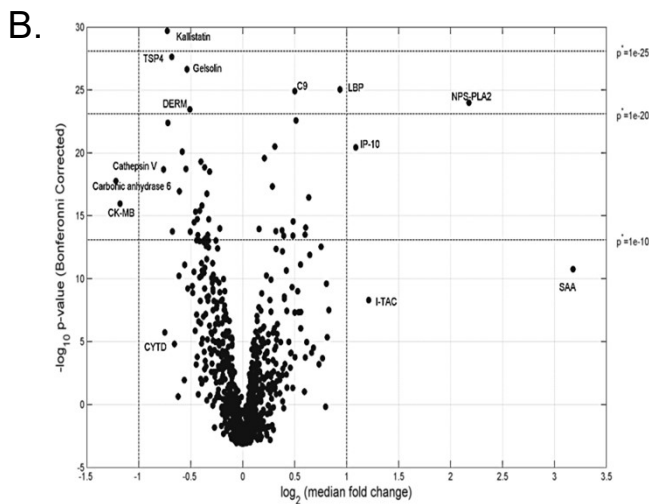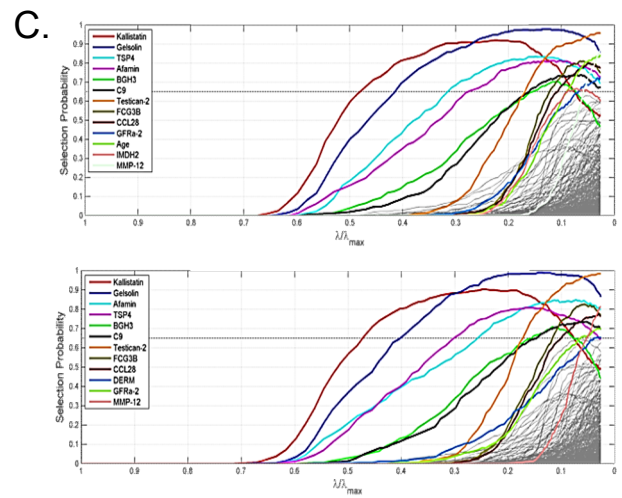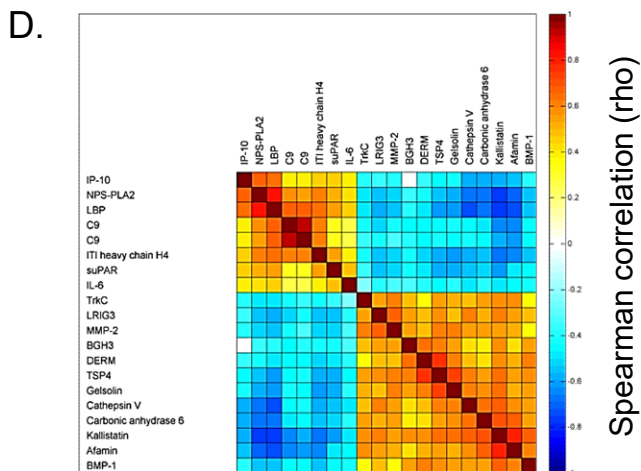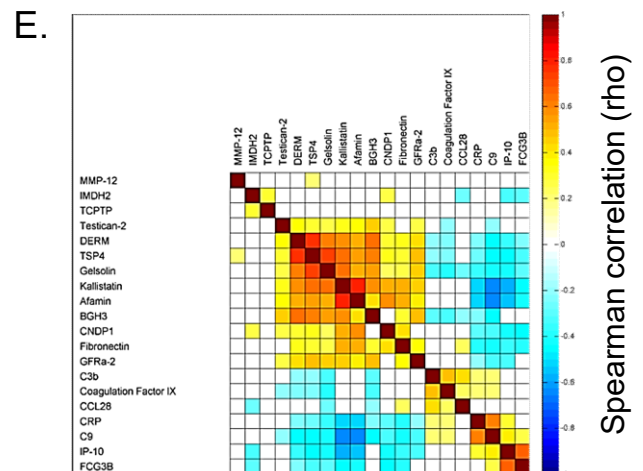

Supplement: JCM.00467-17_zjm999095669s1.pdf [file JCM.00467-17_zjm999095669s1.pdf]
