# Supplementary material for: Discovery and Validation of a Six-Marker Serum Protein Signature for the Diagnosis of Active Pulmonary Tuberculosis
Source: PubMed Central journal article supplement (PMC5625392; doi:10.1128/jcm.00467-17), 2017-09-25

FIG S7 A. Confidence score assessment based on the quality of associated meta data used for the 'true' classification (non-TB or TB) of all unique samples tested in Phase II. Abbreviations: SP, sputum culture; FU, follow-up; SC, solid culture; LC, liquid culture; Xp, Gene Xpert data; QFT, quantiferon test (interferon- $\gamma$  release assay); sm, smear. B. TB LogOdds for all Phase II samples (n=616) with high-confidence metadata scores. True non-TB (blue) and true TB (red) samples were ordered by their HR6 LogOdds score. The dotted line indicated the decision boundary (LogOdds = 0) for classification by the HR6 model. False-positives and false-negatives are indicated by the blue and red brackets, respectively. C. All unique Phase II samples with high-confidence metadata (n=569) were used to generate ROC curves stratified by HIV and smear status. D. Subgroup analysis for a more restrictive subset of only those samples that had not been used in training of the model, stratified by HIV and smear status.

**A.**

| Score | Non-TB (n=323)                                                                                             | N (%)       | TB (n=295)                                                                                 | N (%)       |
|-------|------------------------------------------------------------------------------------------------------------|-------------|--------------------------------------------------------------------------------------------|-------------|
| 1     | $\geq 2$ SPs neg and FU cultures neg                                                                       | 171 (52.9%) | $\geq 2$ SPs pos on both SC and LC, or SC or LC pos on 2 SPs and Xp pos                    | 200 (67.8%) |
| 0.75  | $\geq 2$ SPs neg, no FU cultures, but improved/recovered, or Only 1 SP neg, but Xp or QFT neg              | 136 (42.1%) | 2 SPs pos, but 1-2 cultures neg, or 2 SC pos or 2 LC pos, and sm or Xp pos                 | 62 (21.0%)  |
| 0.5   | $\geq 2$ SPs neg, but no FU or same/worse symptoms at FU, or only 1 SP neg and extensive lack of meta data | 7 (2.2%)    | Only 1 SP pos, but sm/Xp pos or FU, or 1-2 positive cultures and Xp low quant, passed away | 18 (6.1%)   |
| 0.25  | Insufficient meta data for neg culture status                                                              | 0 (0%)      | Only 1 SP, no FU and 2 cultures contam/lost, or no culture data but 2 sm pos               | 11 (3.7%)   |
| 0     | No meta data for neg culture status                                                                        | 9 (2.8%)    | Only 1 SP pos w/o sm/Xp/FU, or No meta data for pos culture status                         | 4 (1.4%)    |

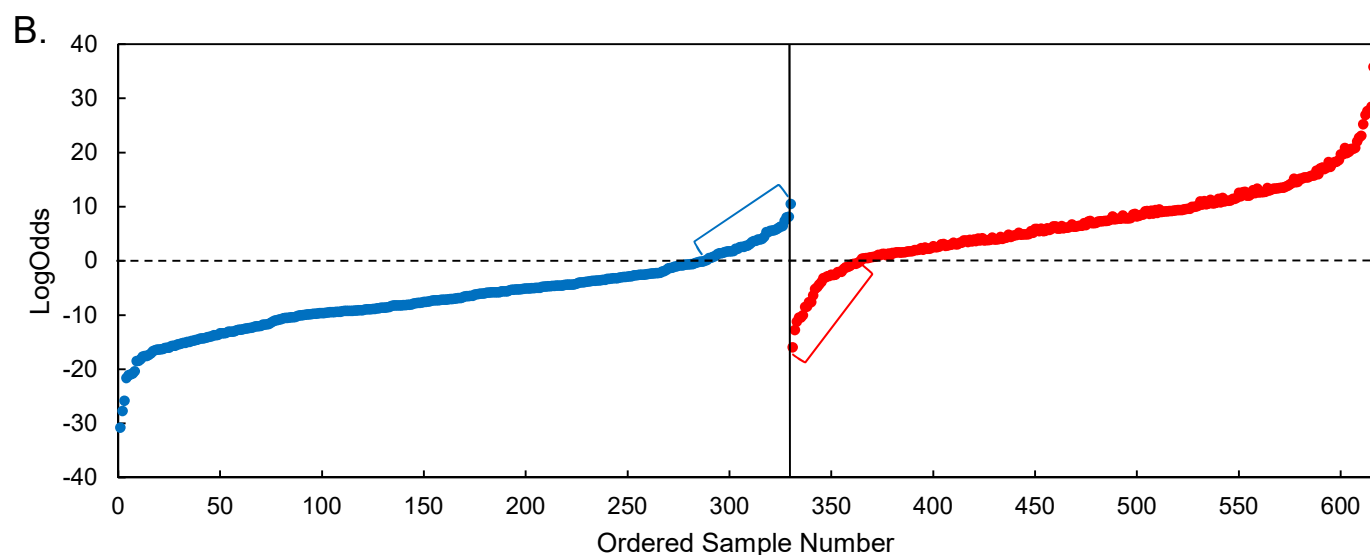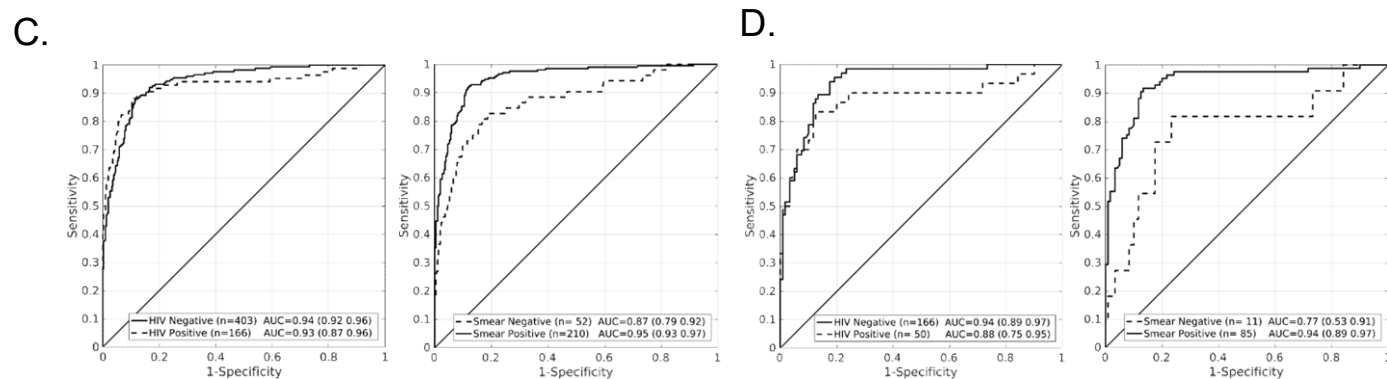

Supplement: JCM.00467-17_zjm999095669s7.pdf [file JCM.00467-17_zjm999095669s7.pdf]
